# Supplementary material for: A prefoldin-associated WD-repeat protein (WDR92) is required for the correct architectural assembly of motile cilia
Source: PubMed Central journal article supplement — Mol Biol Cell. 2016 Apr 15;27(8):1204–9. doi: 10.1091/mbc.E16-01-0040 (PMC4831875; doi:10.1091/mbc.e16-01-0040), 2016-04-15
Supplement: supp_E16-01-0040v1_CombinedSupMats.pdf [file supp_E16-01-0040v1_CombinedSupMats.pdf]

# Supplemental Materials

*Molecular Biology of the Cell*

Patel-King and King

**Table 1      WDR92 Sequence Accession Numbers used for Phylogenetic Analysis**

This table indicates the taxonomic position, species name and accession numbers for the proteins used for phylogenetic analysis; the BLAST expect values obtained by searching with the *S. mediterranea* sequence are shown.

## Supplemental Table 1

### WDR92 Protein Sequence Accession Numbers used for Phylogenetic Analysis

| Taxonomic Description            | Species Name                                     | Accession Number | Expect Value <sup>#</sup> |
|----------------------------------|--------------------------------------------------|------------------|---------------------------|
| Chlorophyta (green alga)         | <i>Chlamydomonas reinhardtii</i>                 | NM_001695862     | 1e-154                    |
| Chlorophyta (green alga)         | <i>Ostreococcus lucimarinus</i>                  | XM_001416582     | 1e-106                    |
| Chlorophyta (green alga)         | <i>Volvox carteri</i>                            | NM_002952807     | 3e-158                    |
| Lycopodiopsida (club moss)       | <i>Selaginella moellendorffii</i>                | NM_002960961     | 3e-149                    |
| Bryophyta (moss)                 | <i>Physcomitrella patens</i>                     | NM_001758244     | 1e-150                    |
| Phaeophyceae (brown alga)        | <i>Ectocarpus siliculosus</i>                    | CBJ32445         | 2e-153                    |
| Chordata (mammal)                | <i>Homo sapiens</i>                              | EU832799         | 5e-180                    |
| Chordata (fish)                  | <i>Danio rerio</i>                               | NM_001017621     | 0.0                       |
| Chordata (sea squirt)            | <i>Ciona intestinalis</i>                        | NM_002126401     | 4e-165                    |
| Platyhelminthes (planarian)      | <i>Schmidtea mediterranea</i>                    | SMU15038805      | Query Sequence            |
| Echinodermata (sea urchin)       | <i>Strongylocentrotus purpuratus</i>             | XM_780956        | 2e-174                    |
| Arthropoda (insect)              | <i>Drosophila melanogaster</i>                   | BT032972         | 3e-147                    |
| Annelida (leach)                 | <i>Helobdella robusta</i>                        | XM_009020014     | 6e-179                    |
| Cnidaria (sea anemone)           | <i>Nematostella vectensis</i>                    | XM_001622813     | 6e-178                    |
| Placozoa                         | <i>Trichoplax adhaerens</i>                      | XM_002115890     | 2e-180                    |
| Choanoflagellata                 | <i>Monosiga brevicolis</i>                       | XM_001750000     | 8e-148                    |
| Excavata                         | <i>Trypanosoma cruzi</i>                         | XM_800678        | 3e-111                    |
| Oomycota                         | <i>Phytophthora sojae</i>                        | XM_009541021     | 1e-152                    |
| Chytridomycota                   | <i>Batrachochytrium dentrobatidis</i>            | XM_006676312     | 4e-153                    |
| Zygomycota                       | <i>Lichtheimia ramosa</i>                        | CDS06562         | 4e-77                     |
| Alveolata                        | <i>Tetrahymena thermophila</i>                   | XM_001021497     | 9e-147                    |
| Alveolata                        | <i>Paramecium tetraurelia</i>                    | XM_001446273     | 9e-109                    |
| Bacillariophyceae (Diatom)       | <i>Thalassiosira pseudonana</i>                  | XM_002286243     | 3e-134                    |
| Angiospermae* (flowering plants) | <i>Pyrus x bretschneideri</i> Chinese white pear | NM_009353091     | 1e-131                    |

<sup>#</sup> The *Schmidtea* ortholog was used as the query sequence for tBLASTn and/or BLASTP searches of the non-redundant databases at NCBI.

\* Note that this sequence is the only WDR92 ortholog present in any angiosperm genome sequenced to date. Consequently, it almost certainly derives from sample contamination.
